# Supplementary material for: Perinatal High-Fat Diet Influences Ozone-Induced Responses on Pulmonary Oxidant Status and the Molecular Control of Mitophagy in Female Rat Offspring
Source: MDPI journal article supplement (doi:10.3390/ijms22147551), 2021-07-14
Supplement: s1 [file s1]

**Table S2.** Primer sequences for real-time quantitative PCR.

| <b>Gene</b>                      | <b>Forward primer (5'-3')</b> | <b>Reverse primer (5'-3')</b> |
|----------------------------------|-------------------------------|-------------------------------|
| <u>Reference genes</u>           |                               |                               |
| <i>Tubab1b</i>                   | AGCGCAGCATCCAGTTTGT           | CTGTGGTGTTGCTCAGCATAGA        |
| <i>Rpl13a</i>                    | GCGGATGAACACCAACCCGT          | CAGCCTGGCCTCTTTTGGTCT         |
| <i>Ppia</i>                      | TCCATGGCAAATGCTGGACCAA        | CCTGGACCCAAAACGCTCCA          |
| <u>Antioxidants</u>              |                               |                               |
| <i>Cat</i>                       | GAATGGCTATGGCTCACACA          | CAAGTTTTTGATGCCCTGGT          |
| <i>Sod1</i>                      | CGAGCATGGGTTCCATGTC           | CTGGACCGCCATGTTTCTTAG         |
| <i>Sod2</i>                      | ATTAACGCGCAGATCATGCA          | CCTCGGTGACGTTTCAATTGT         |
| <u>Mitophagy</u>                 |                               |                               |
| <i>Pink1</i>                     | CCAAACACCTTGGCCTTCTA          | CTTAAGATGGCTTCGCTGGA          |
| <i>Bnip3</i>                     | CAGAGCGGCGAGGAGAACCTGCAG      | GCTGCTCCCATTTCCATTGCTGAAG     |
| <i>Bnip3l</i>                    | AGGCTAACCTGCAGCACAGT          | CACTGCCGATGAAACTGCTA          |
| <u>Mitochondrial biogenesis</u>  |                               |                               |
| <i>Ppargc1a</i>                  | GGGACATGTGCAGCCAAGACT         | GATCTGGGCAAAGAGGCTGGT         |
| <i>Ppargc1b</i>                  | AGCGCTTCGAGGTGTTTGGT          | TTCTCAGGGTAGCGCCGTTC          |
| <i>Tfam</i>                      | AATTGCAGCCATGTGGAGGGAG        | GCCGGGCTTCCTTCTCTAAGC         |
| <u>Mitochondrial fusion</u>      |                               |                               |
| <i>Mfn1</i>                      | CGGAGGCATATGAAAGTGGC          | CCATCAGTTCCCTCCACACT          |
| <i>Mfn2</i>                      | TTGACTCCAGCCATGTCCAT          | GGTGACGATGGAGTTGCATC          |
| <i>Opa1</i>                      | CAGCTGGCAGAAGATCTCAAG         | CATGAGCAGGATTTTGACACC         |
| <u>Mitochondrial fission</u>     |                               |                               |
| <i>Drp1</i>                      | TGGAGATGGTGGTCAGGAAC          | TTTCGTGCAACTGGAAGTGG          |
| <i>Fis1</i>                      | ATGGATGCCCAGAGATGAAG          | ACGATGCCTCTACGGATGTC          |
| <u>Oxidative phosphorylation</u> |                               |                               |
| <i>Ndufb3</i>                    | GAAGAAGCTTGCTGCACGAGG         | ACGCAGCAAACCCCCATTTG          |
| <i>Sdhb</i>                      | GAACGGAGACAAGTACCTGGGG        | GATGGTGTGGCAGCGGTAGA          |
| <i>Cyc1</i>                      | ATGTTGCCACCTTCCTTCGCT         | AGGACTGACCACTTATGCCGC         |
| <i>Cox4i1</i>                    | CTGAAGGAGAAGGAGAAGG           | CAGTGAAGCCGATGAAGA            |

**Table S3.** Immunoprecipitation buffer composition

| <b>Component</b>                       | <b>Concentration</b> |
|----------------------------------------|----------------------|
| Tris                                   | 50 mM                |
| NaCl                                   | 150 mM               |
| Glycerol                               | 10% (w/v)            |
| NP-40                                  | 0.05% (w/v)          |
| Ethylenediaminetetraacetic acid (EDTA) | 1 mM                 |
| cOmplete protease inhibitor cocktail*  | 1x                   |
| PhosSTOP phosphatase inhibitor*        | 1x                   |
| pH                                     | 7.4                  |

\*Roche, Basel, Switzerland

**Table S4.** Laemmli buffer (4x)

| <b>Component</b>             | <b>Concentration</b> |
|------------------------------|----------------------|
| Tris                         | 0.25 M               |
| Sodium dodecyl sulfate (SDS) | 8% (w/v)             |
| Glycerol                     | 40% (w/v)            |
| Dithiothreitol (DTT)         | 0.4 M                |
| Bromophenol Blue             | 0.02% (w/v)          |
| pH                           | 6.8                  |

**Table S5.** Western blot primary antibodies

| <b>Antigen</b> | <b>Dilution</b> | <b>Supplier</b>           |
|----------------|-----------------|---------------------------|
| BNIP3          | 1:1000          | Cell Signaling Technology |
| BNIP3L         | 1:1000          | Cell Signaling Technology |
| SOD2           | 1:1000          | Santa Cruz Biotechnology  |
| OXPHOS I-V     | 1:1000          | Abcam                     |

**Table S6.** Western blot secondary antibodies

| <b>Primary antibody</b> | <b>Secondary antibody</b> | <b>Dilution</b> | <b>Supplier</b>     |
|-------------------------|---------------------------|-----------------|---------------------|
| BNIP3                   | Anti-rabbit               | 1:10,000        | Vector Laboratories |
| BNIP3L                  | Anti-rabbit               | 1:10,000        | Vector Laboratories |
| SOD2                    | Anti-mouse                | 1:10,000        | Vector Laboratories |
| OXPHOS I-V              | Anti-mouse                | 1:10,000        | Vector Laboratories |
